# Supplementary material for: Essential oils against bacterial isolates from cystic fibrosis patients by means of antimicrobial and unsupervised machine learning approaches
Source: PubMed Central journal article supplement (PMC7021809; doi:10.1038/s41598-020-59553-8), 2020-02-14
Supplement: 41598_2020_59553_MOESM1_ESM.pdf [file 41598_2020_59553_MOESM1_ESM.pdf]

## **Supplementary Information**

### **Essential oils against bacterial isolates from cystic fibrosis patients by means of antimicrobial and unsupervised machine learning approaches**

Rino Ragno, Rosanna Papa, Alexandros Patsilinakos, Gianluca Vrenna, Stefania Garzoli, Vanessa Tuccio, Ersilia Vita Fiscarelli, Laura Selan and Marco Artini

**Table 1S.** Percentage of susceptibility of *S.aureus* and *P. aeruginosa*

| Classes of antimicrobials                 | Molecules | Susceptibility according to EUCAST <sup>a</sup> |     |     |                     |     |     |
|-------------------------------------------|-----------|-------------------------------------------------|-----|-----|---------------------|-----|-----|
|                                           |           | <i>S.aureus</i>                                 |     |     | <i>P.aeruginosa</i> |     |     |
|                                           |           | % S                                             | % I | % R | % S                 | % I | % R |
| Quinolones                                | CI        | 60                                              | 5   | 35  | 60                  | -   | 40  |
|                                           | LE        | 60                                              | 5   | 35  | 55                  | -   | 45  |
| Sulfonamides                              | T/S       | 100                                             | -   | -   | Nt                  |     |     |
| Macrolides                                | ER        | 10                                              | 10  | 80  | Nt                  |     |     |
| Lincosamides                              | CLI       | 25                                              | 5   | 70  | Nt                  |     |     |
| Oxazolidinones                            | LIN       | 100                                             | -   | -   | Nt                  |     |     |
| Carbapenems                               | IP        | Nt                                              |     |     | 55                  | -   | 45  |
|                                           | MP        | Nt                                              |     |     | 60                  | 5   | 35  |
| Penicillins+ $\beta$ lactamase inhibitors | PTC       | Nt                                              |     |     | 80                  | -   | 20  |
| Aminoglycosides                           | TM        | Nt                                              |     |     | 50                  | 5   | 45  |
|                                           | AK        | Nt                                              |     |     | 50                  | 5   | 45  |
| Monobactams                               | AT        | Nt                                              |     |     | 45                  | 45  | 10  |
| Cephalosporins                            | CAZ       | Nt                                              |     |     | 60                  | -   | 40  |
|                                           | PM        | Nt                                              |     |     | 60                  | -   | 40  |
| Polymyxins                                | CO        | Nt                                              |     |     | 100                 | -   | -   |

S, susceptible; I, intermediate; R, resistant; CI, ciprofloxacin; LE, levofloxacin; T/S, trimethoprim/sulfamethoxazole; ER, erythromycin; CLI, clindamycin; LIN, linezolid; IP, imipenem; MP, meropenem; PTC, piperacillin-tazobactam; TM, tobramycin; AK, amikacin; AT, aztreonam; CAZ, ceftazidime; PM, cefepime, CO, colistin. Nt, non-tested.

<sup>a</sup> EUCAST breakpoints (in milligrams per liter) for *S.aureus*: CI-5 $\mu$ g, S  $\leq$  1 - R > 1; LE-5 $\mu$ g, S  $\leq$  1 - R > 1; T/S -1.25/23.75  $\mu$ g, S  $\leq$  4 - R > 4; ER-15  $\mu$ g, S  $\leq$  1 - R > 2; CLI-2  $\mu$ g, S  $\leq$  0.25 - R > 0.5; LIN-10  $\mu$ g, S  $\leq$  4 - R > 4;

<sup>a</sup> EUCAST breakpoints (in milligrams per liter) for *P.aeruginosa*: CI-5 $\mu$ g, S  $\leq$  0.5 - R > 0.5; LE-5 $\mu$ g, S  $\leq$  1 - R > 1; IP-10  $\mu$ g, S  $\leq$  4 - R > 8; MP-10  $\mu$ g, S  $\leq$  2 - R > 8; PTC -100/10  $\mu$ g, S  $\leq$  16 - R > 16; TM -10  $\mu$ g, S  $\leq$  4 - R > 4; AK-30  $\mu$ g, S  $\leq$  8 - R > 16; AT-30  $\mu$ g, S  $\leq$  1 - R > 16; CAZ-30  $\mu$ g, S  $\leq$  8 - R > 8; PM-30  $\mu$ g, S  $\leq$  8 - R > 8; CO-10  $\mu$ g, S  $\leq$  2 - R > 2.

**Table 2S.** Essential oils names.

| <b>EO<br/>ID</b> | <b>EO Name</b>                       | <b>EO<br/>ID</b> | <b>EO Name</b>                                 |
|------------------|--------------------------------------|------------------|------------------------------------------------|
| 1                | Chamomile Morocco Essential Oil      | 32               | Birch Essential Oil                            |
| 2                | Sage Sclarea Essential Oil           | 33               | Fennel Essential Oil                           |
| 3                | Salvia Officinalis Essential Oil     | 34               | Cedar Fruit Essential Oil                      |
| 4                | Red Thyme Essential Oil              | 35               | Lemon Essential Oil                            |
| 5                | Tea Tree Oil                         | 36               | Roman Chamomile Essential Oil                  |
| 6                | Melissa Oiio Essential               | 37               | Savory Essential Oil                           |
| 7                | Pinus Mugo Essential Oil             | 38               | Rosemary Essential Oil                         |
| 8                | Geranium Bourbon Essential Oil       | 39               | Ceylon Cinnamon Peel Essential Oil             |
| 9                | Oregano Essential Oil                | 40               | Eucaliptus Globulus Essential Oil              |
| 10               | Ylang Ylang Essential Oil            | 41               | Sweet Orange Essential Oil                     |
| 11               | Coriander Essential Oil              | 42               | Niaouly Essential Oil                          |
| 12               | Lavandula Angustifolia Essential Oil | 43               | Artemisia Essential Oil                        |
| 13               | Myrtle Essential Oil                 | 44               | Cajeput Essential Oil                          |
| 14               | Garlic Essential Oil                 | 45               | Black Pepper Essential Oil                     |
| 15               | Cardamom Essential Oil               | 46               | White Thyme Essential Oil                      |
| 16               | Mandarin Essential Oil               | 47               | Marjoram Essential Oil                         |
| 17               | Hyssop Essential Oil                 | 48               | Cloves Essential Oil                           |
| 18               | Grapefruit Essential Oil             | 49               | Cypress Essential Oil                          |
| 19               | Cymbopogon Essential Oil             | 50               | Nutmeg Natural Essential Oil                   |
| 20               | Pinus Sibirica Essential Oil         | 51               | Peppermint Essential Oil                       |
| 21               | Camphor Essential Oil                | 52               | Verbena officinalis Essential Oil              |
| 22               | Cadè Essential Oil                   | 53               | Basil Essential Oil                            |
| 23               | Cedar Leaves Essential Oil           | 54               | Cymbopogon martinii Essential Oil              |
| 24               | Ginger Essential Oil                 | 55               | Laurel Essential Oil                           |
| 25               | Cumin Essential Oil                  | 56               | Anise Essential Oil                            |
| 26               | Patchouli Essential Oil              | 57               | Incense Essential Oil                          |
| 27               | Bitter Orange Essential Oil          | 58               | Mentha Suaveolens (Sicily) Essential Oil       |
| 28               | Eucalyptus Essential Oil             | 59               | Coridotthymus Capitatus (Sicily) Essential Oil |
| 29               | Pinus Silvester Essential Oil        | 60               | Thymus Vulgaris (Sicily) Essential Oil         |
| 30               | Bergamot Essential Oil               | 61               | Origanum Hirtum (Sicily) Essential Oil         |
| 31               | Juniper Essential Oil                |                  |                                                |

**Table 3S:** Chemical composition (%) of Birch EO.

| # <sup>1</sup> | Name                              | RI <sup>2</sup> | RI <sup>lit3</sup> | Area % |
|----------------|-----------------------------------|-----------------|--------------------|--------|
| 1              | 2-cyclopenten-1-one, 3-methyl     | 1510            | 1513               | 0.5    |
| 2              | 2-cyclopenten-1-one, 2,3-dimethyl | 1528            | 1535               | 0.7    |
| 3              | $\alpha$ -cedrene                 | 1590            | 1599               | 9.9    |
| 4              | dihydrocurcumene                  | 1610            | *                  | 3.5    |
| 5              | isolekene                         | 1655            | *                  | 5.7    |
| 6              | $\alpha$ -muurolene               | 1685            | 1690               | 4.4    |
| 7              | $\delta$ -cadinene                | 1758            | 1758               | 22.2   |
| 8              | calamenene                        | 1802            | 1804               | 15.2   |
| 9              | $\alpha$ -methylnaphtalene        | 1889            | 1891               | 0.9    |
| 10             | guaiacol                          | 1895            | 1897               | 3.5    |
| 11             | isolongifolene, 4,5,9,10-dehydro- | 1920            | *                  | 1.8    |
| 12             | creosol                           | 1960            | 1956               | 12.8   |
| 13             | o-creosol                         | 2009            | 2011               | 0.9    |
| 14             | phenol                            | 2011            | 2012               | 1.1    |
| 15             | p-ethylguaiacol                   | 2027            | 2032               | 5.0    |
| 16             | m-cresol                          | 2075            | 2081               | 1.4    |
| 17             | phenol, 2,5-dimethyl              | 2080            | 2085               | 1.8    |
| 18             | p-propylguaiacol                  | 2102            | 2103               | 2.1    |
| 19             | eugenol                           | 2155            | 2166               | 0.9    |
| 20             | cadalene                          | 2199            | 2200               | 4.6    |
| 21             | isoeugenol                        | 2270            | 2268               | 0.9    |
|                | Unidentified compounds            |                 |                    | 0.2    |

# indicates the compound identification number; <sup>2</sup> Retention indices measured on polar column; <sup>3</sup> Retention indices from literature; \*RI<sup>lit</sup> not available for polar column. <sup>+</sup>Normal alkane RI;

**Table 4S:** Chemical composition (%) of Ceylon Cinnamon EO

| # <sup>1</sup> | Name                       | RI <sup>2</sup> | RI <sup>lit3</sup> | Area % |
|----------------|----------------------------|-----------------|--------------------|--------|
| 1              | $\alpha$ -pinene           | 1021            | 1021               | 0.9    |
| 2              | camphene                   | 1060            | 1065               | 0.3    |
| 3              | $\beta$ -pinene            | 1100            | 1105               | 0.3    |
| 4              | $\alpha$ -phellandrene     | 1161            | 1160               | 0.9    |
| 5              | limonene                   | 1200            | 1198               | 0.5    |
| 6              | $\beta$ -phellandrene      | 1203            | 1204               | 1.4    |
| 7              | m-cymene                   | 1260            | 1258               | 2.1    |
| 8              | $\alpha$ -copaene          | 1490            | 1487               | 0.4    |
| 9              | $\beta$ -linalool          | 1535            | 1537               | 5.2    |
| 10             | terpinen-4-ol              | 1600            | 1603               | 0.3    |
| 11             | $\beta$ -caryophyllene     | 1617            | 1619               | 4.7    |
| 12             | cinnamaldheyde, o-methoxy- | 1650            | *                  | 1.0    |
| 13             | humulene                   | 1665            | 1668               | 0.8    |
| 14             | $\alpha$ -terpineol        | 1677            | 1675               | 0.4    |
| 15             | safrole                    | 1870            | 1874               | 0.3    |
| 16             | cinnamaldheyde             | 2037            | 2049               | 49.4   |
| 17             | eugenol                    | 2170            | 2175               | 21.2   |
| 18             | eugenol acetate            | 2270            | 2277 <sup>+</sup>  | 0.9    |
| 19             | benzyl benzoate            | 2648            | 2652               | 8.6    |
|                | Unidentified compounds     |                 |                    | 0.4    |

# indicates the compound identification number; <sup>2</sup> Retention indices measured on polar column; <sup>3</sup> Retention indices from literature; \*RI<sup>lit</sup> not available for polar column. <sup>+</sup>Normal alkane RI.

**Table 5S:** Chemical composition (%) of Cadè EO

| # <sup>1</sup> | Name                              | RI <sup>2</sup> | RI <sup>lit3</sup> | Area % |
|----------------|-----------------------------------|-----------------|--------------------|--------|
| 1              | 2-cyclopenten-1-one, 3-methyl     | 1510            | 1513               | 0.7    |
| 2              | $\alpha$ -cedrene                 | 1590            | 1599               | 7.9    |
| 3              | aromadendrene                     | 1609            | 1610               | 1.1    |
| 4              | dihydrocurcumene                  | 1690            | 1696               | 3.5    |
| 5              | $\alpha$ -selinene                | 1751            | 1750               | 2.2    |
| 6              | $\alpha$ -muurolene               | 1755            | *                  | 4.0    |
| 7              | $\delta$ -cadinene                | 1758            | 1758               | 27.7   |
| 8              | calamenene                        | 1802            | 1832               | 14.8   |
| 9              | phenol, 2-methoxy-                | 1838            | 1846               | 4.7    |
| 10             | isolongifolene, 4,5,9,10-dehydro- | 1920            | *                  | 1.7    |
| 11             | creosol                           | 1960            | 1956               | 12.6   |
| 12             | o-creosol                         | 2009            | 2011               | 1.0    |
| 13             | phenol                            | 2011            | 2012               | 1.0    |
| 14             | p-ethylguaiacol                   | 2027            | 2032               | 5.4    |
| 15             | m-cresol                          | 2075            | 2081               | 1.5    |
| 16             | phenol, 3-methyl-                 | 2095            | 2099               | 1.1    |
| 17             | p-propylguaiacol                  | 2102            | 2103               | 1.9    |
| 18             | eugenol                           | 2155            | 2175               | 0.4    |
| 19             | gleenol                           | 2175            | *                  | 1.1    |
| 20             | cadalene                          | 2199            | 2200               | 4.3    |
| 21             | isoeugenol                        | 2270            | 2268               | 1.2    |
|                | Unidentified compounds            |                 |                    | 0.2    |

# indicates the compound identification number; <sup>2</sup> Retention indices measured on polar column; <sup>3</sup> Retention indices from literature; \*RI<sup>lit</sup> not available for polar column. <sup>+</sup>Normal alkane RI;

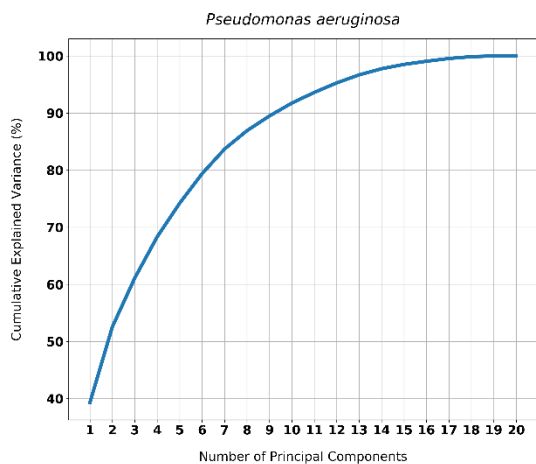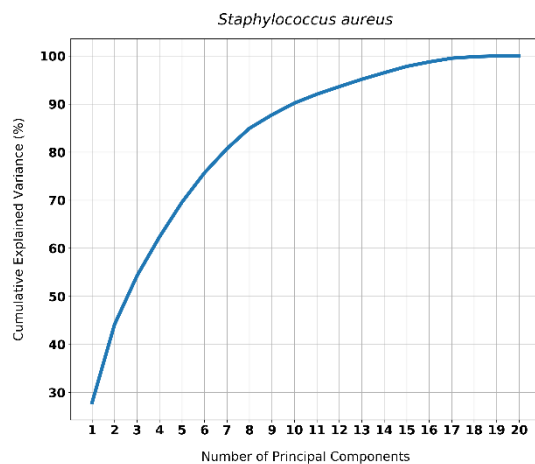

**Figure 1S.** Explained cumulative variance versus the number of extracted PCs for the PA (left panel) and SA (right panel) datasets

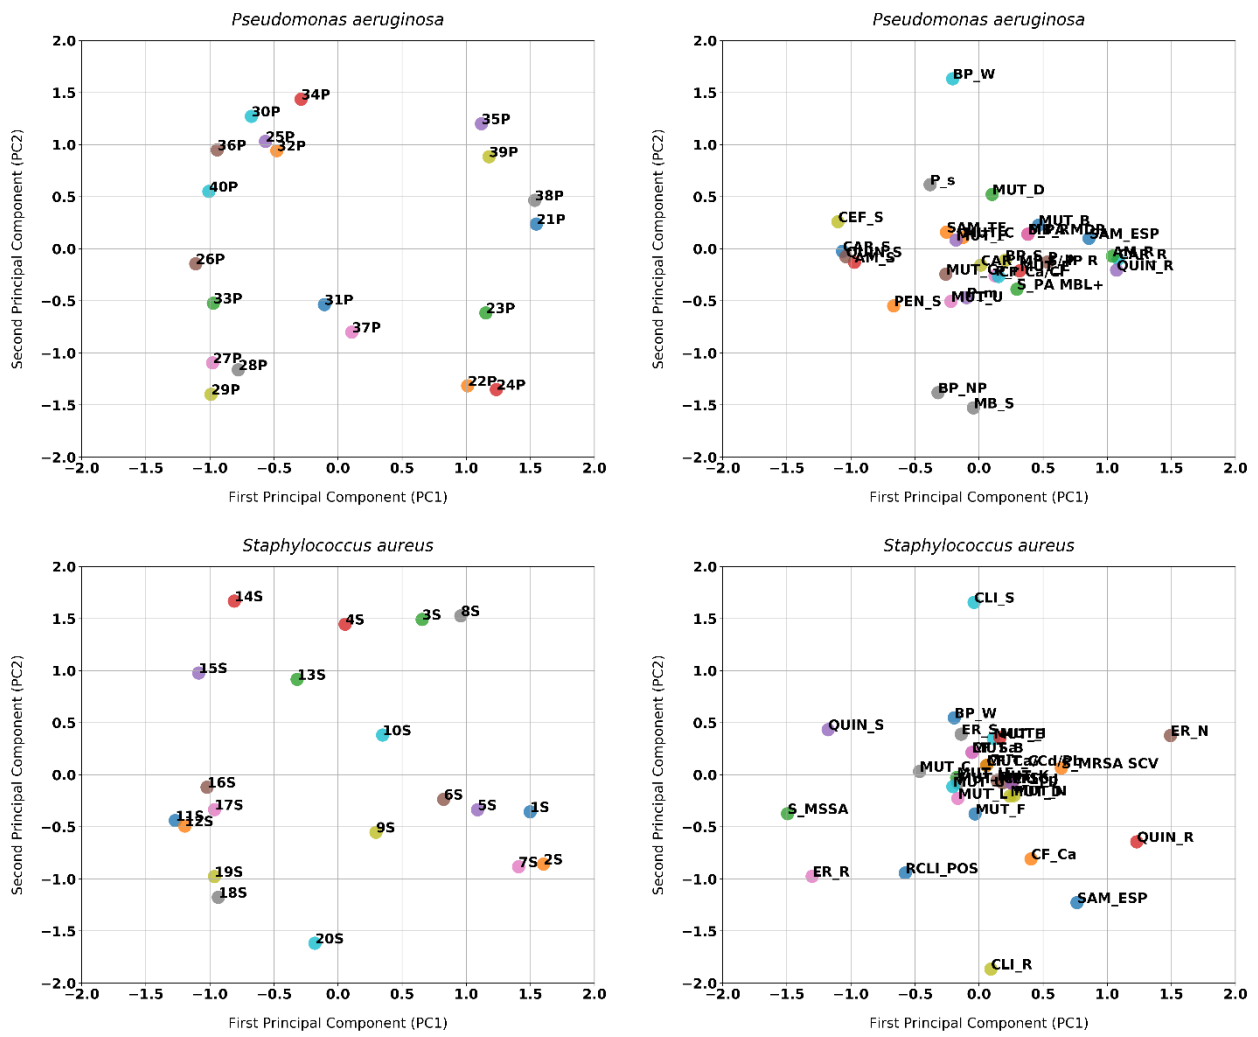

**Figure 2S.** Scores (left panels) and loadings (right panels) plots for the PA (Top Panels) and SA (bottom panels) datasets



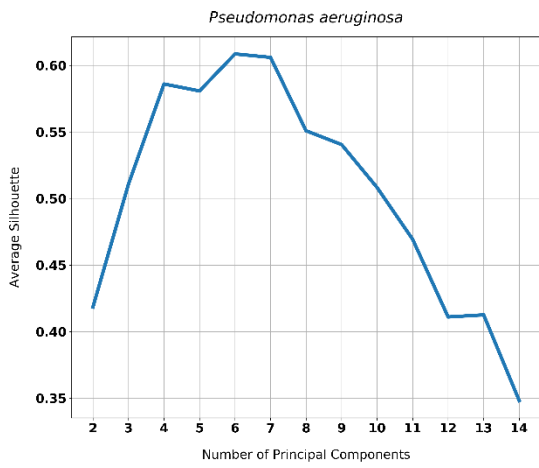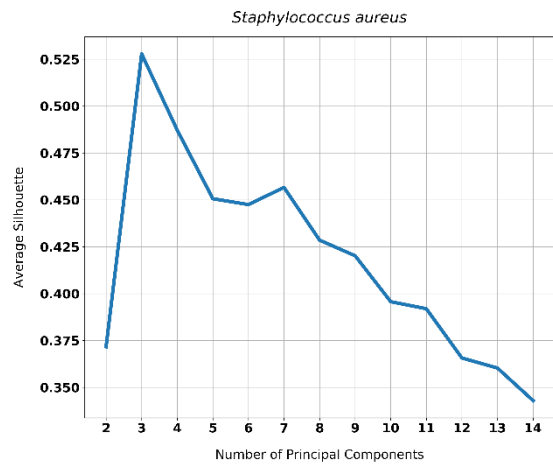

**Figure 3S.** Average silhouette scores versus the number of clusters. The maximum indicate the optimal number of clusters.

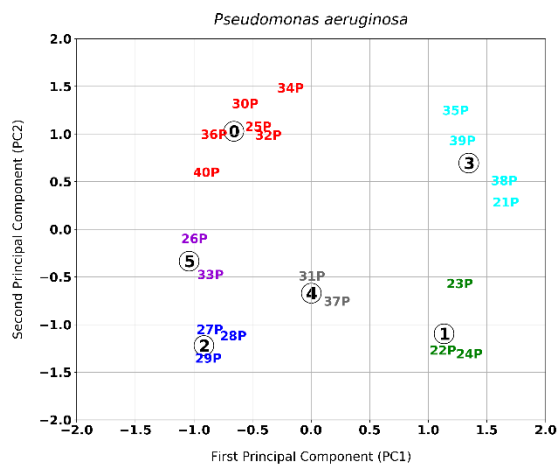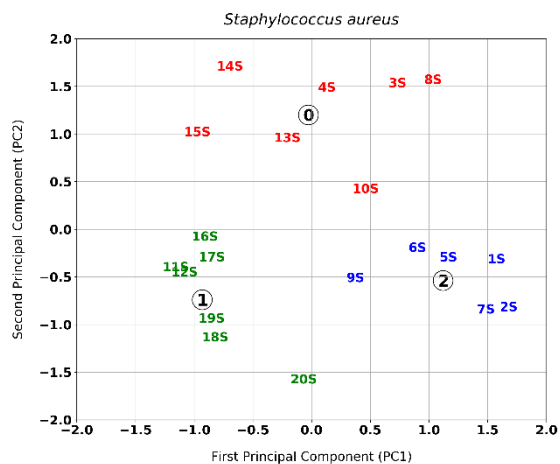

**Figure 4S.** Score plots indicating the clustered PA (left panel) and SA (right panel) datasets. The k-means centroids of each cluster are also reported.
